# Supplementary material for: Exome Sequencing to Predict Neoantigens in Melanoma
Source: Oxford University Press journal article supplement (doi:10.1158/2326-6066.cir-15-0088), 2015-06-05
Supplement: 23266066cir150088-sup-147697_1_supp_2989026_nvvvyv.docx [file 23266066cir150088-sup-147697_1_supp_2989026_nvvvyv.docx]

**Supplementary Figure 4: Investigation of PABPC1 and PABPC3 sequences**

**A: PABPC3 sequencing reads alignment with PABPC1 and PABPC3 reference sequence**

**Reference sequences:**

**PABPC3**: TCAGAACCATGCTGCATACTATCCTCCTAGCCAAATTGCTCGACTAAGACCAAGTCCTCGCTGGACTGCTCAGGGTGCCAGACCTCATCCATTCCAAAATAAGCCCAGTGCTATCCGCCCA

**PABPC1**: TCAGAACCGTGCTGCATACTATCCTCCTAGCCAAATTGCTCAACTAAGACCAAGTCCTCGCTGGACTGCTCAGGGTGCCAGACCTCATCGTAAGTCTTTTTTCTTTTAATTAAGGTTGGGGATTGAG

**Exome sequencing alignment**:

TCAGAACCATGCTGCATACTATCCTCCTAGCCAAATTGCTCAGCTAAGACCAAGTCCTCGCTGGACTGCTCA 41=1X28=2S 8=1X61=2S

TCCTCCTAGCCAAATTGCTCAGCTAAGACCAAGTCCTCGCTGGACTGCTCAGGGTGCCAGACCTCATCCATT 20=2X50= 21=1X46=4S

CCTCCTAGCCAAATTGCTCAGCTAAGACCAAGTCCTCGCTGGACTGCTCAGGGTGCCAGACCTCATCCATTC 19=2X51= 20=1X46=5S

CTCCTAGCCAAATTGCTCAGCTAAGACCAAGTCCTCGCTGGACTGCTCAGGGTGCCAGACCTCATCCATTCC 18=2X52= 19=1X46=6S

CTCCTAGCCAAATTGCTCAGCTAAGACCAAGTCCTCGCTGGACTGCTCAGGGTGCCAGACCTCATCCATTCC 18=2X52= 19=1X46=6S

TCCTAGCCAAATTGCTCAGCTAAGACCAAGTCCTCGCTGGACTGCTCAGGGTGCCAGACCTCATCCATTCCA 17=2X53= 18=1X46=7S

AGCCAAATTGCTCAGCTAAGACCAAGTCCTCGCTGGACTGCTCAGGGTGCCAGACCTCATCCATTCCAAAAT 13=2X57= 14=1X46=11S

AGCCAAATTGCTCAGCTAAGACCAAGTCCTCGCTGGACTGCTCAGGGTGCCAGACCTCATCCATTCCAAAAT 13=2X57= 14=1X46=11S

AGCCAAATTGCTCAGCTAAGACCAAGTCCTCGCTGGACTGCTCAGGGTGCCAGACCTCATCCATTCCAAAAT 13=2X57= 14=1X46=11S

AGCCAAATTGCTCAGCTAAGACCAAGTCCTCGCTGGACTGCTCAGGGTGCCAGACCTCATCCATTCCAAAAT 13=2X57= 14=1X46=11S

AGCCAAATTGCTCAGCTAAGACCAAGTCCTCGCTGGACTGCTCAGGGTGCCAGACCTCATCCATTCCAAAAT 13=2X57= 14=1X46=11S

CCAAATTGCTCAGCTAAGACCAAGTCCTCGCTGGACTGCTCAGGGTGCCAGACCTCATCCATTCCAAAATAT 11=2X58=1S 12=1X46=13S

CCAAATTGCTCAGCTAAGACCAAGTCCTCGCTGGACTGCTCAGGGTGCCAGACCTCATCCATTCCAAAATAT 11=2X58=1S 12=1X46=13S

CCAAATTGCTCAGCTAAGACCAAGTCCTCGCTGGACTGCTCAGGGTGCCAGACCTCATCCATTCCAAAATAT 11=2X58=1S 12=1X46=13S

CAAATTGCTCAGCTAAGACCAAGTCCTCGCTGGACTGCTCAGGGTGCCAGACCTCATCCATTCCAAAATATG 10=2X58=2S 11=1X46=14S

AAATTGCTCAGCTAAGACCAAGTCCTCGCTGGACTGCTCAGGGTGCCAGACCTCATCCATTCCAAAATATGC 9=2X58=3S 10=1X46=15S

GCTCAGCTAAGACCAAGTCCTCGCTGGACTGCTCAGGGTGCCAGACCTCATCCATTCCAAAATATGCCCGGT 4=2X58=1X4=3S 5=1X46=20S

GCTCAGCTAAGACCAAGTCCTCGCTGGACTGCTCAGGGTGCCAGACCTCATCCATTCCAAAATATGCCCGGT 4=2X58=1X4=3S 5=1X46=20S

TCAGCTAAGACCAAGTCCTCGCTGGACTGCTCAGGGTGCCAGACCTCATCCATTCCAAAATATGCCCGGTGC 2=2X58=1X4=1X4= 4S46=22S

TCAGCTAAGACCAAGTCCTCGCTGGACTGCTCAGGGTGCCAGACCTCATCCATTCCAAAATATGCCCGGTGC 2=2X58=1X4=1X4= 4S46=22S

AGCTAAGACCAAGTCCTCGCTGGACTGCTCAGGGTGCCAGACCTCATCCATTCCAAAATATGCCCGGTGCTA 2X58=1X4=1X6= 2S46=24S

**B: PABPC3 dinucleotide change resulting in R -->Q amino acid change in the protein sequence.**

‘Mutated’ peptide sequence tested: Y Y P P S Q I A **Q** L

**Wild-type sequence: Mutated sequence:**

|tac|tat|cct|cct|agc|caa|att|gct|c**ga**|cta| |tac|tat|cct|cct|agc|caa|att|gct|c**ag**|cta|

Y Y P P S Q I A R L Y Y P P S Q I A Q L
