# Supplementary material for: Exome Sequencing to Predict Neoantigens in Melanoma
Source: Oxford University Press journal article supplement (doi:10.1158/2326-6066.cir-15-0088), 2015-06-05
Supplement: 23266066cir150088-sup-147697_1_supp_2989028_nppvyp.docx [file 23266066cir150088-sup-147697_1_supp_2989028_nppvyp.docx]

**Supplementary Table 1: Cell line information and Sanger sequence confirmed mutations in each cell line**

| **Sample ID** | **HLA type** | **Non-synon mutations** | **Frameshift mutations** | **Number of total individual epitopes predicted** | **Number of peptides ordered (% total predicted)** |
| --- | --- | --- | --- | --- | --- |
| **D05** | -A*02 -B*27, -B*44 -Cw02, Cw*05 | 118 | 5 | 312 | 63 (19.2%) |
| **D14** | -A*03, -A*24 -B*07 Cw15 | 136 | 8 | 319 | 54 (17%) |
| **D41** | A*01, -A*02 -B*08 -Cw07 | 287 | 2 | 756 | 139 (18.4%) |
| **A02** | -A*02, -A*31 -B*14, -B*27 Cw2 | 238 | 3 | 930 | 184 (19.8%) |
| **A06** | -A*02, -A*03 -B*27, -B*60 -Cw2, -Cw3 | 262 | 2 | 955 | 202 (21.1%) |
